# Supplementary material for: Characterization of Conserved and Novel microRNAs in Lilium lancifolium Thunb. by High-Throughput Sequencing
Source: PubMed Central journal article supplement (PMC5811567; doi:10.1038/s41598-018-21193-4), 2018-02-13

# Characterization of Conserved and Novel microRNAs in *Lilium lancifolium*

## Thunb.by High-Throughput Sequencing

Xiangfeng He<sup>1,2,3</sup>, Awraris Getachew Shenkute<sup>4</sup>, Wenhe Wang<sup>1,2,3,\*</sup>, ShufaXu<sup>4,\*</sup>

<sup>1</sup> Beijing Engineering Research Center of Rural Landscape Planning and Design,  
College of Landscape Architecture, Beijing University of Agriculture, Beijing 102206,  
China

<sup>2</sup> Beijing Collaborative Innovation Center for Eco-Environmental Improvement with  
Forestry and Fruit Trees, Beijing 102206, China

<sup>3</sup> Beijing Laboratory of Urban and Rural Ecological Environment, Beijing 100083,  
China

<sup>4</sup> Key Laboratory of Pollinating Insect Biology, Ministry of Agriculture, Institute of  
Apicultural Research, Chinese Academy of Agricultural Sciences, Beijing 100093,  
China

E-mail addresses of the authors:

Xiangfeng He: [hxf791230@163.com](mailto:hxf791230@163.com)

AwrarisGetachewShenkute: [awraris2007@yahoo.com](mailto:awraris2007@yahoo.com)

Wenhe Wang: [wwhals@163.com](mailto:wwhals@163.com)

ShufaXu: [xushufa@caas.cn](mailto:xushufa@caas.cn)

\*Corresponding authors: Dr. Wenhe Wang and Dr. ShufaXu

**Supplementary Figure S1 The stem-loop structures of conserved *L.lancifolium* miRNA precursors. (The mature miRNA in red; the miRNA\* from small RNA sequencing in purple; the miRNA\* from prediction in skyblue)**

LL-miR156a (c45184.graph\_c0)

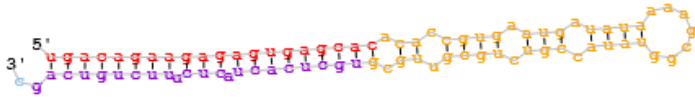

LL-miR156a (c51027\_g1)

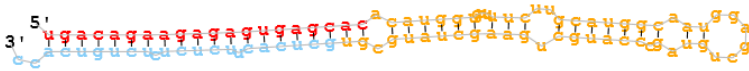

LL-miR156a (c103364\_g2)

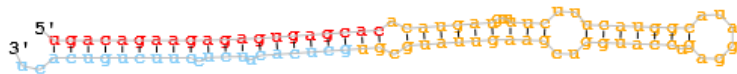

LL-miR156a (c205656\_g1)

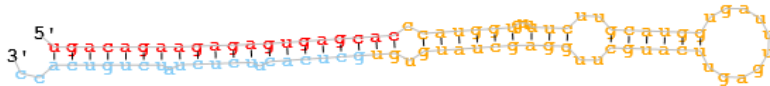

LL-miR156i (c45184.graph\_c0)

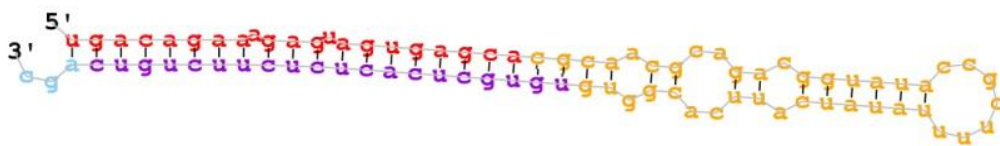

LL-miR159a (CL2574.Contig1\_All)

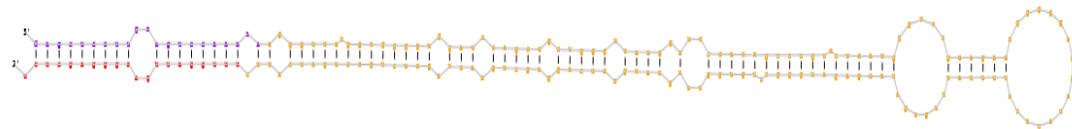

LL-miR159a (CL2574.Contig4\_All)

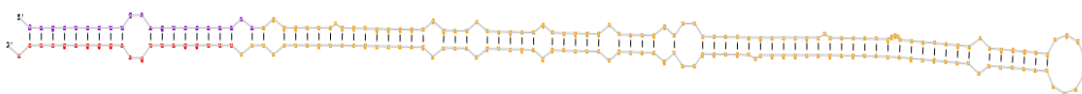

LL-miR159b (c117583\_g1)

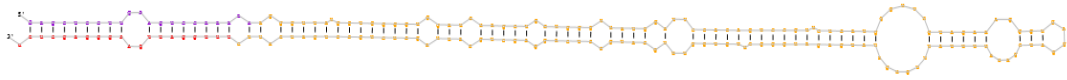

LL-miR159b (c44060.graph\_c0)

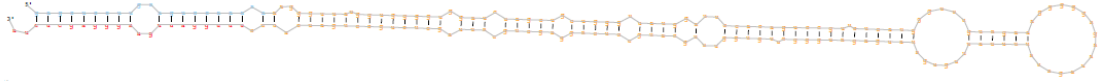

LL-miR319a (c120927\_g2)

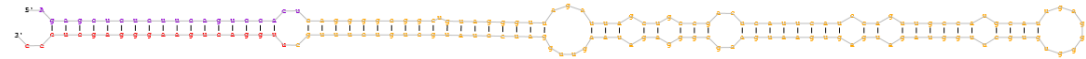

LL-miR160a (c19797.graph\_c0)

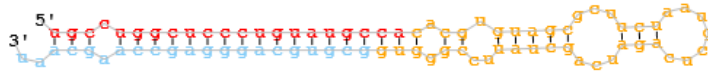

LL-miR160a (c50045\_g1)

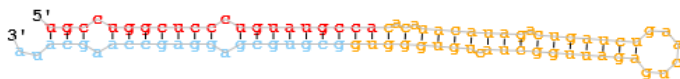

LL-miR160f (c99102\_g1)

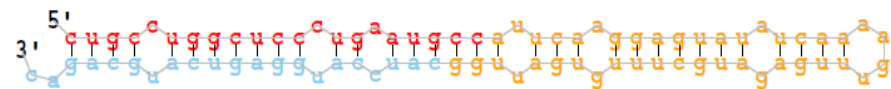

LL-miR162a (Unigene26825\_All)

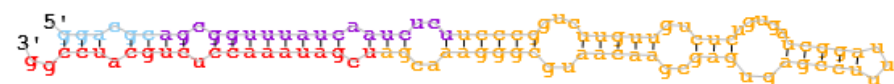

LL-miR164a (c96196\_g1)

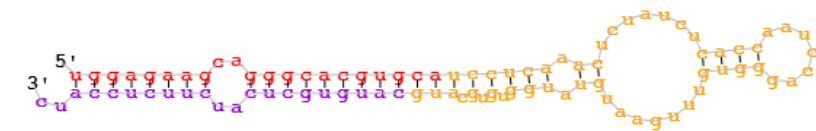

LL-miR164a (c30311.graph\_c0)

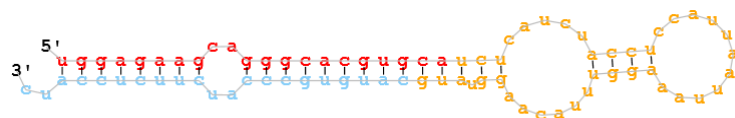

LL-miR166f (Unigene32510\_All)

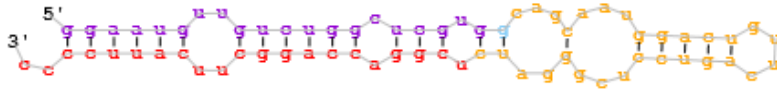

LL-miR166f (c39808.graph\_c0)

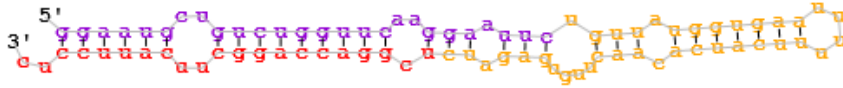

LL-miR166f (c121414\_g2)

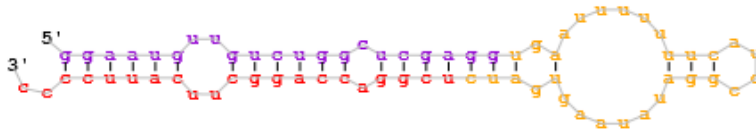

LL-miR166g (c106540\_g1)

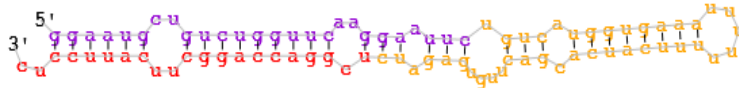

LL-miR167a (c105919\_g1)

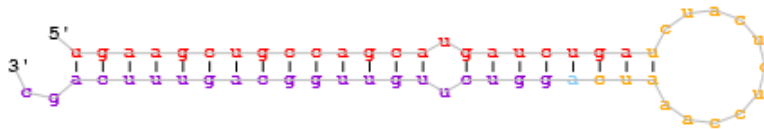

LL-miR168a (c71740.graph\_c0)

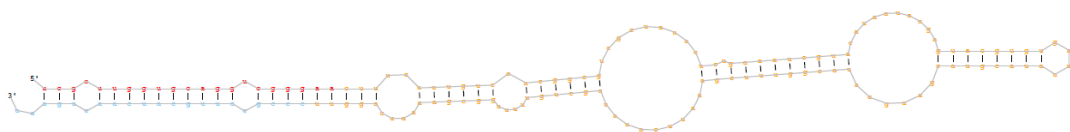

LL-miR168a (c24174.graph\_c0)

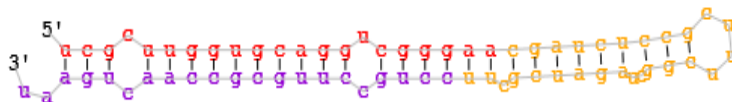

LL-miR168a (c105404\_g1)

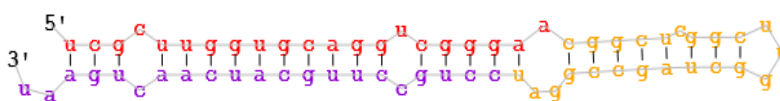

LL-miR172a (c79803.graph\_c0)

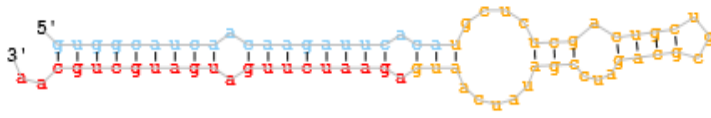

LL-miR390a (c7928.graph\_c0)

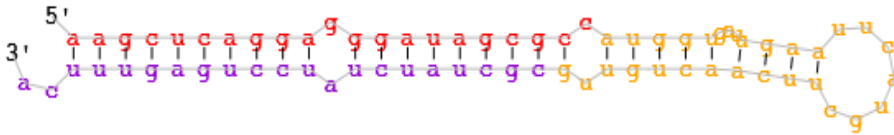

LL-miR395a (c12817.graph\_c0)

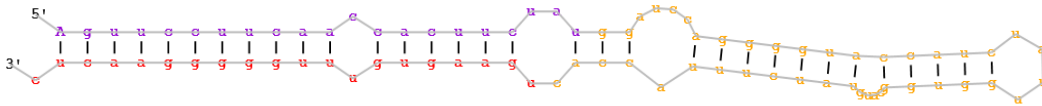

LL-miR395k (c5100.graph\_c0)

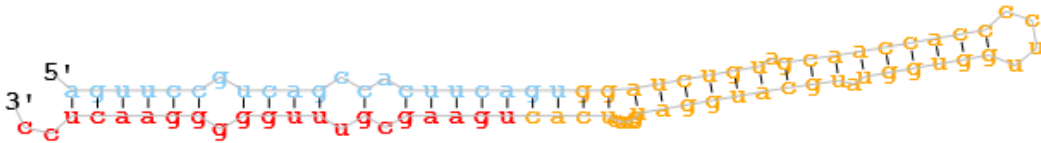

LL-miR396a (c103053\_g1)

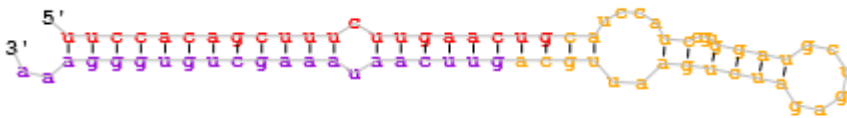

LL-miR396a (Unigene25901\_All)

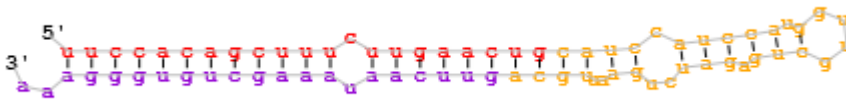

LL-miR396f (c30849\_g1)

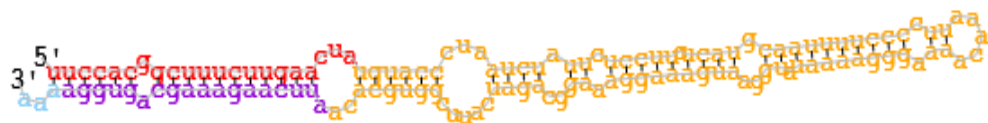

LL-miR398b (c221661\_g1)

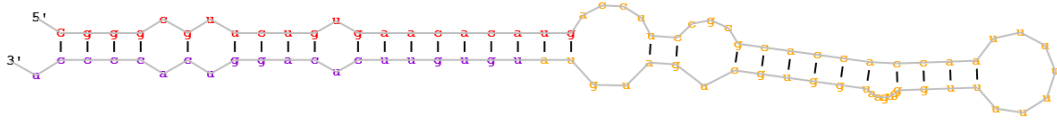

LL-miR398b (c35683\_g1)

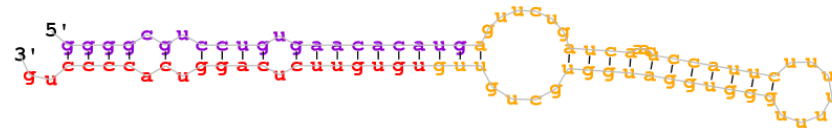

LL-miR399a (c191701\_g1)

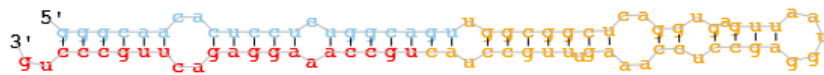

LL-miR408b (c121837\_g2)

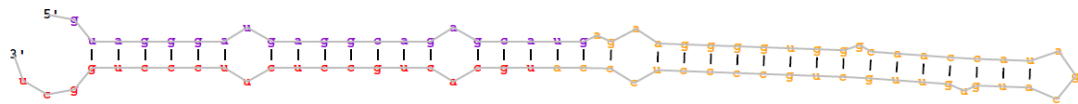

LL-miR845 (c54746.graph\_c0)

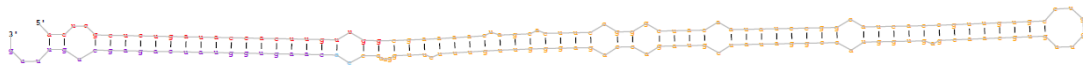

LL-miR2118e (c28582\_g1)

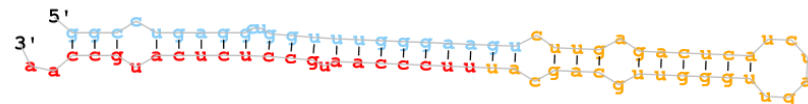

LL-miR2118a (Unigene6944\_All)

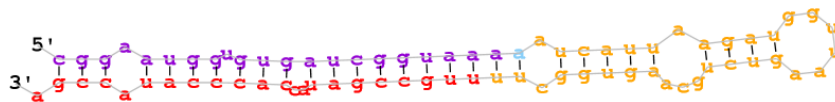

**Supplementary Figure S2 The stem-loop structures of novel *L.lancifolium* miRNA precursors. (The mature miRNA in red; the miRNA\* from small RNA sequencing in purple; the miRNA\* from prediction in skyblue)**

LL-miR01 (c33038.graph\_c0)

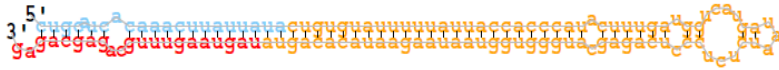

LL-miR02 (c1069.graph\_c1)

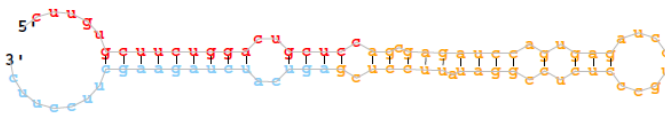

LL-miR03 (c15590.graph\_c0)

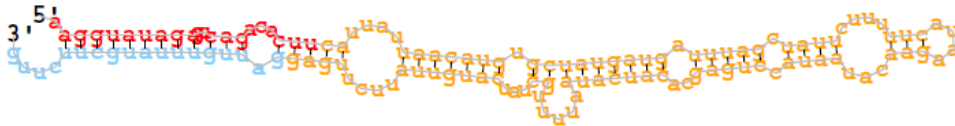

LL-miR04 (c25608.graph\_c0)

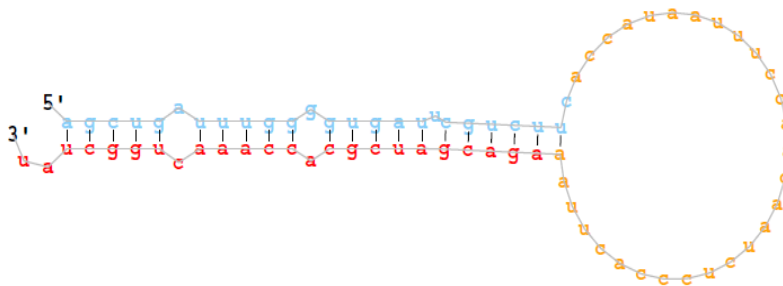

LL-miR05 (c28639.graph\_c0)

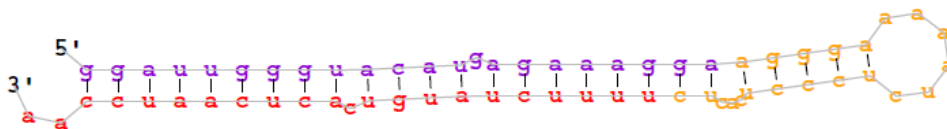

LL-miR06 (c30876.graph\_c0)

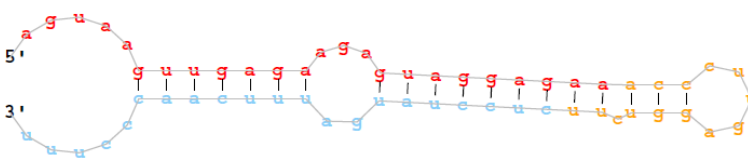

LL-miR07 (c31471.graph\_c0)

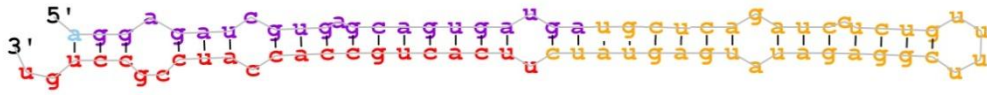

LL-miR08 (c35378.graph\_c0)

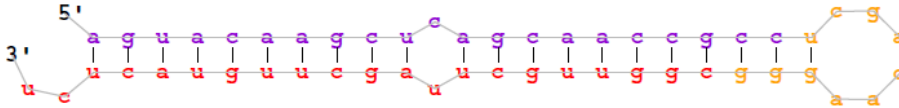

LL-miR09 (c36638.graph\_c0)

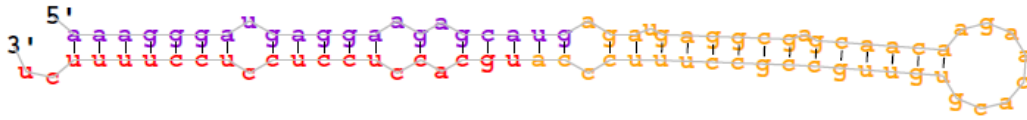

LL-miR10 (CL3742.Contig2\_All)

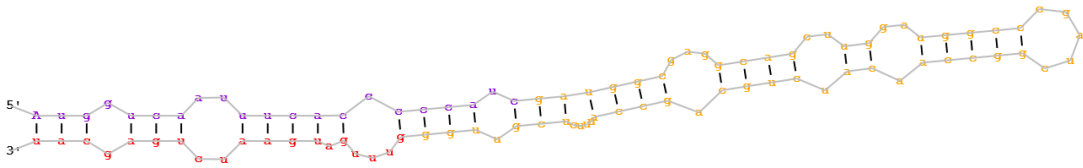

LL-miR11(c53683.graph\_c0)

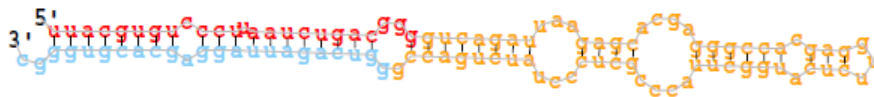

LL-miR12 (c56352\_g1)

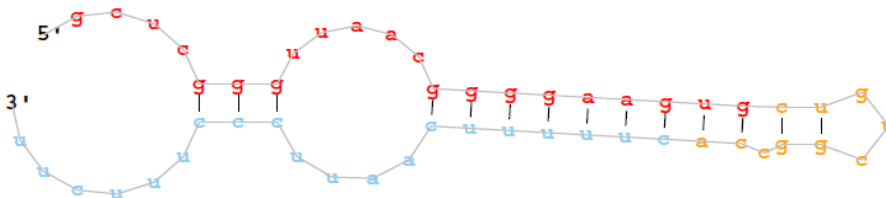

LL-miR13 (c59256\_g1)

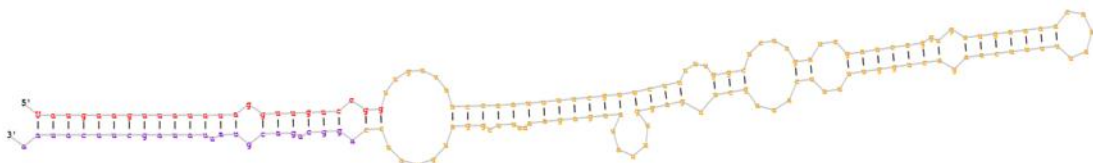



LL-miR14 (c79455\_graph\_c0)

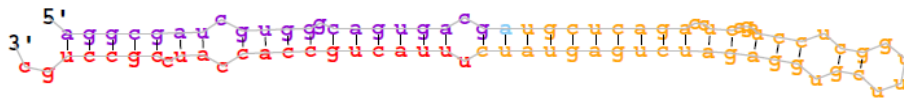

LL-miR15 (c94000\_g1)

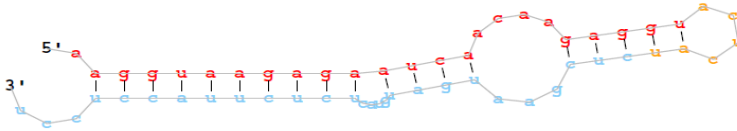

LL-miR16 (c96112\_g1)

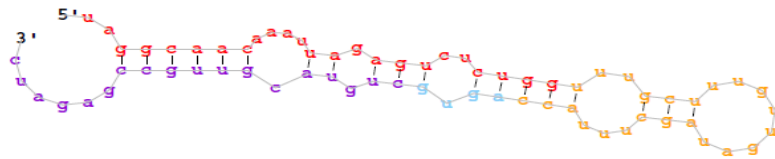

LL-miR17 (c99691\_g1)

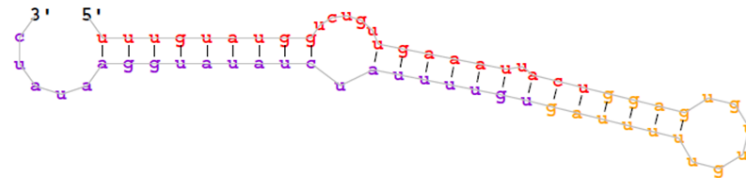

LL-miR18 (c109150\_g1)

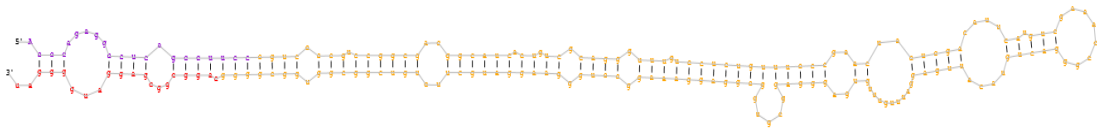

LL-miR19 (c109175\_g1)

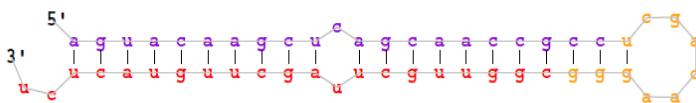

LL-miR20 (c110752\_g2)

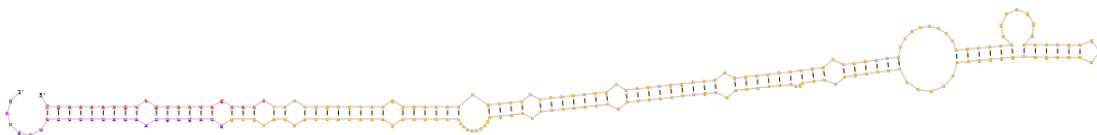

LL-miR21 (c111855\_g1)

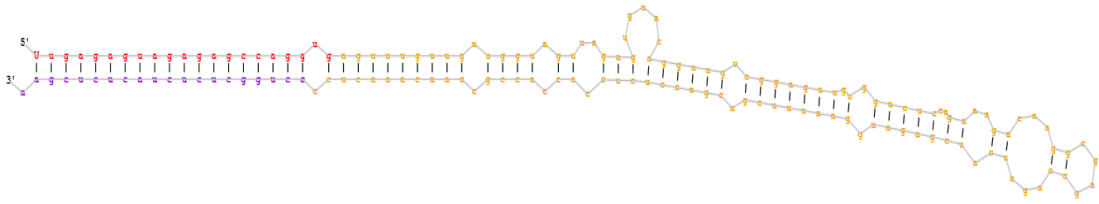

LL-miR22 (c114504\_g1)

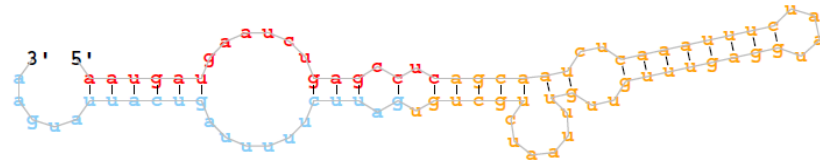

LL-miR23 (c114692\_g4)

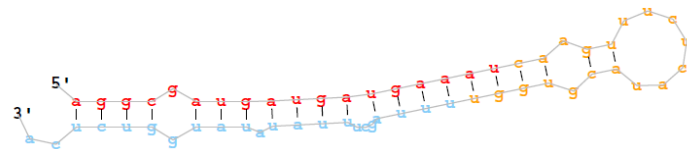

LL-miR24 (c117497\_g1)

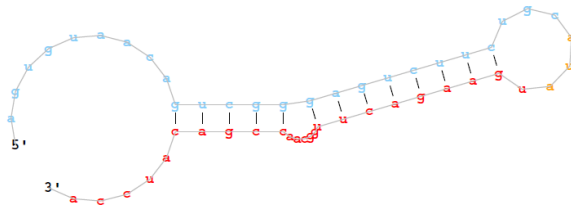

LL-miR25 (c117720\_g1)

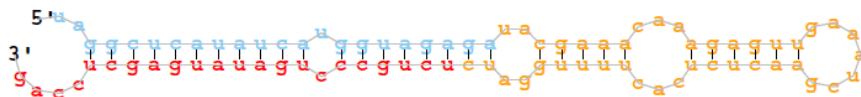

LL-miR26 (c117786\_g3)

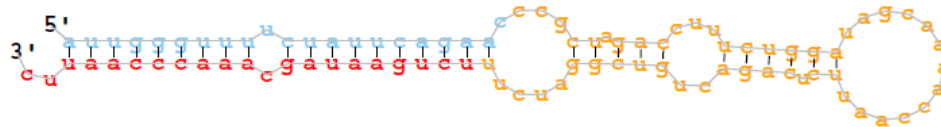

LL-miR27 (c166092\_g)

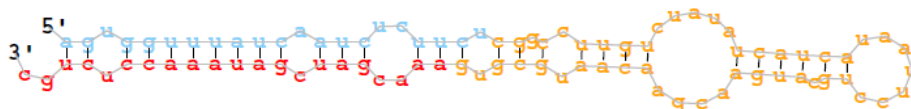

LL-miR28 (c48903.graph\_c0)

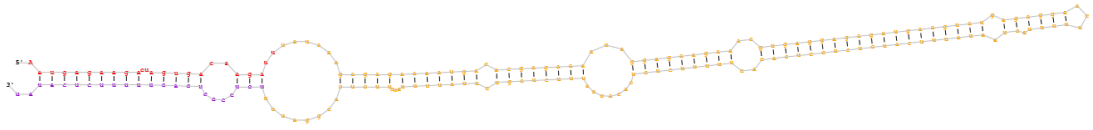

LL-miR29 (CL711.Contig2\_All)

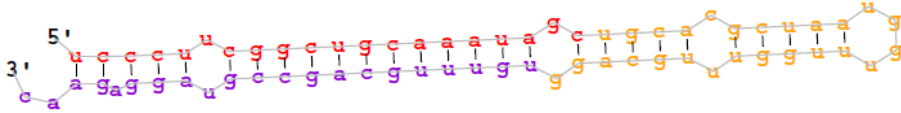

LL-miR30 (CL719.Contig1\_All)

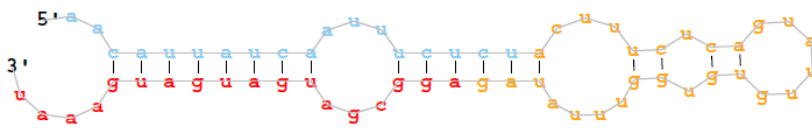

LL-miR31 (CL1297.Contig2\_All)

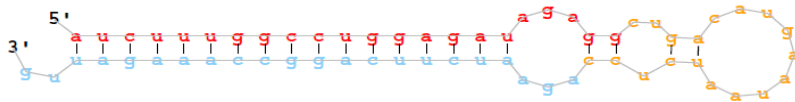

LL-miR32 (c71927\_g1)

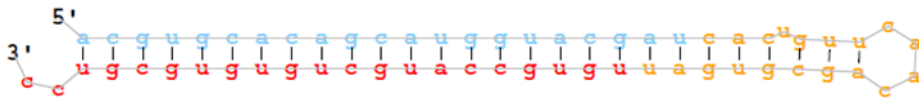

LL-miR33 (CL4047.Contig1\_All)

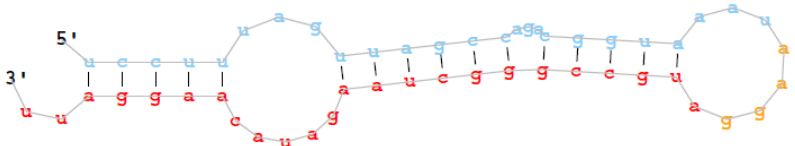

LL-miR34 (HM045458.1)

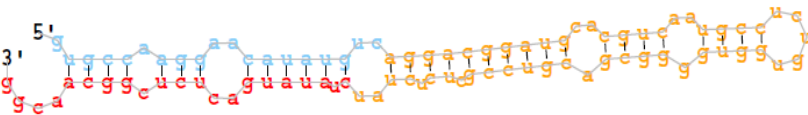

LL-miR35 (JZ391002)

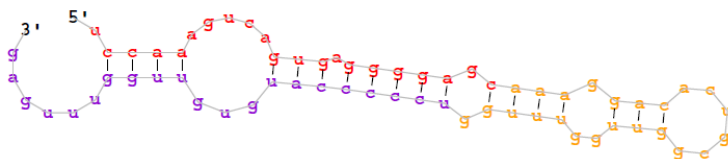

LL-miR36 (Unigene13110\_All)

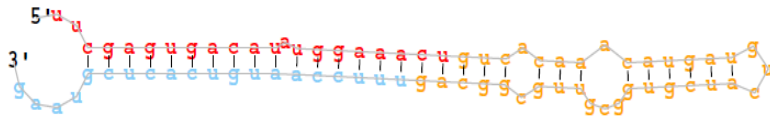

LL-miR37 (Unigene18554\_All)

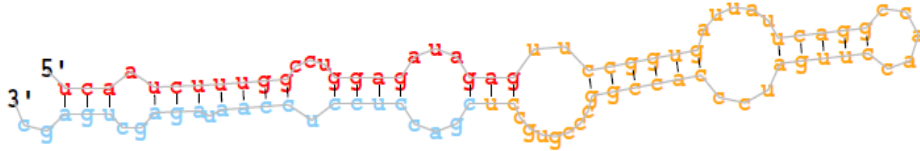

LL-miR38 (c68386.graph\_c0)

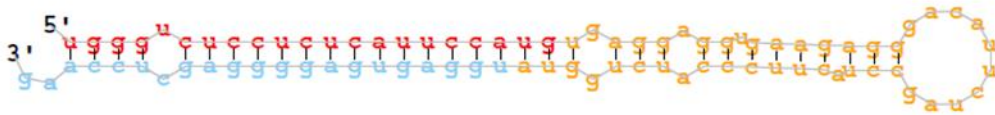

LL-miR39 (Unigene25443\_All)

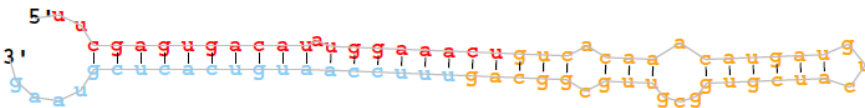

LL-miR40 (c51021.graph\_c0)

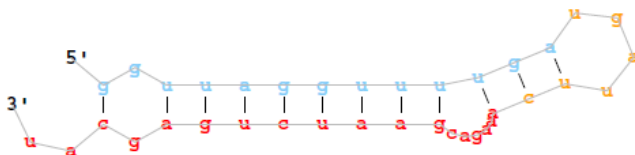

LL-miR41 (c56504.graph\_c0)

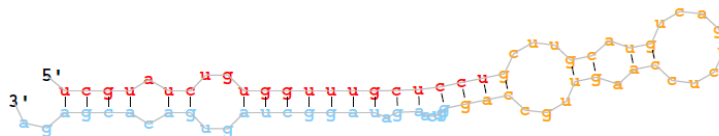

LL-miR42 (c59249.graph\_c0)

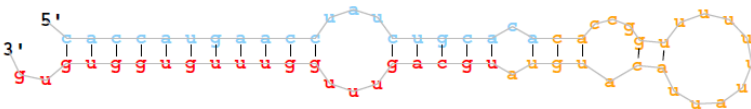

LL-miR43 (GW589960)

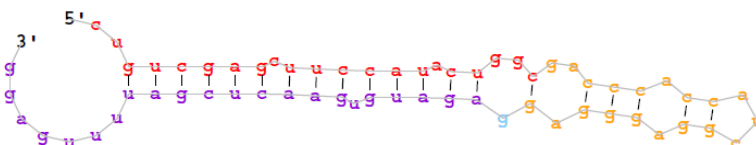

LL-miR44 (JZ391211)

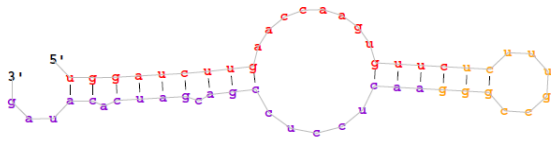

Supplement: 41598_2018_21193_MOESM2_ESM.pdf [file 41598_2018_21193_MOESM2_ESM.pdf]
