# Supplementary material for: Characterization of Conserved and Novel microRNAs in Lilium lancifolium Thunb. by High-Throughput Sequencing
Source: PubMed Central journal article supplement (PMC5811567; doi:10.1038/s41598-018-21193-4), 2018-02-13
Supplement: 41598_2018_21193_MOESM1_ESM.pdf [file 41598_2018_21193_MOESM1_ESM.pdf]

# Characterization of Conserved and Novel microRNAs in *Lilium lancifolium*

## Thunb.by High-Throughput Sequencing

Xiangfeng He<sup>1,2,3</sup>, Awraris Getachew Shenkute<sup>4</sup>, Wenhe Wang<sup>1,2,3,\*</sup>, ShufaXu<sup>4,\*</sup>

<sup>1</sup> Beijing Engineering Research Center of Rural Landscape Planning and Design,  
College of Landscape Architecture, Beijing University of Agriculture, Beijing 102206,  
China

<sup>2</sup> Beijing Collaborative Innovation Center for Eco-Environmental Improvement with  
Forestry and Fruit Trees, Beijing 102206, China

<sup>3</sup> Beijing Laboratory of Urban and Rural Ecological Environment, Beijing 100083,  
China

<sup>4</sup> Key Laboratory of Pollinating Insect Biology, Ministry of Agriculture, Institute of  
Apicultural Research, Chinese Academy of Agricultural Sciences, Beijing 100093,  
China

E-mail addresses of the authors:

Xiangfeng He: [hxf791230@163.com](mailto:hxf791230@163.com)

AwrarisGetachewShenkute: [awraris2007@yahoo.com](mailto:awraris2007@yahoo.com)

Wenhe Wang: [wwhals@163.com](mailto:wwhals@163.com)

ShufaXu: [xushufa@caas.cn](mailto:xushufa@caas.cn)

\*Corresponding authors: Dr. Wenhe Wang and Dr. ShufaXu

Supplementary Table S1 RNA quantity and quality measured by Bioanalyzer 2100

| Sample  | RIN | 28S/18S | RNA concentration<br>(ng/ $\mu$ L) |
|---------|-----|---------|------------------------------------|
| Bulb    | 8.6 | 2.0     | 173                                |
| Flower  | 9.2 | 1.8     | 301                                |
| Leaf    | 8.5 | 1.9     | 407                                |
| Bulblet | 8.4 | 1.5     | 115                                |
